# Supplementary material
Source: publisher site journal article supplement (https://www.spandidos-publications.com/1474/downloadSupplementary)
Supplement: Supplementary file 1 [file downloadSupplementary]

Data S1. Cell proliferation assay.

## **Supplementary methods**

### **Cell proliferation assay**

The proliferation of SACC cells was determined using a Cell Counting Kit-8 (CCK-8, Dojindo, Molecular Technologies, Inc., Kumamoto, Japan) according to the manufacturer's instructions. SACC cells transfected with miR-103a-3p mimics, miR-103a-3p inhibitor, TPD52 siRNA, TPD52 overexpression plasmid and their negative controls were plated at a density of  $5 \times 10^3$  cells per well in 96-well plates and incubated overnight in RPMI 1640 medium supplemented with 10% FBS. At 0, 24, 48, and 72 hours after cells adhered to the surface of culture plates, 10  $\mu$ l of CCK-8 reagent was added to the test well and incubated for 2-3 h. The absorbance was measured at 450 nm using an ELx808 Absorbance Microplate Reader (BioTek Instruments, Inc., Winooski, VT, USA).

Figure S1. miR-103a-3p has no effect on SACC cell proliferation. (A) CCK-8 proliferation assay results for SACC-83 cells transfected with the miR-103a-3p mimics and mimics negative control. (B) CCK-8 proliferation assay results for SACC-LM cells transfected with the miR-103a-3p inhibitor and inhibitor negative control.

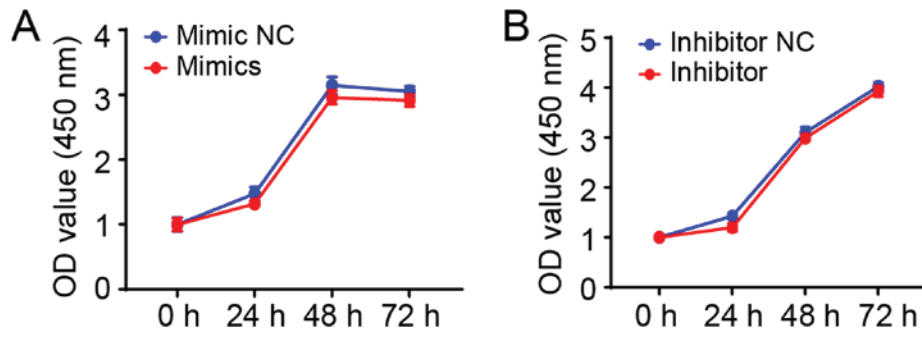

Figure S2. TPD52 has no effect on SACC cell proliferation. (A) CCK-8 proliferation assay results for SACC-LM cells transfected with the TPD52- overexpressing plasmid and empty vector. (B) CCK-8 proliferation assay results for SACC-83 cells transfected with the two TPD52 siRNAs and the negative control construct.

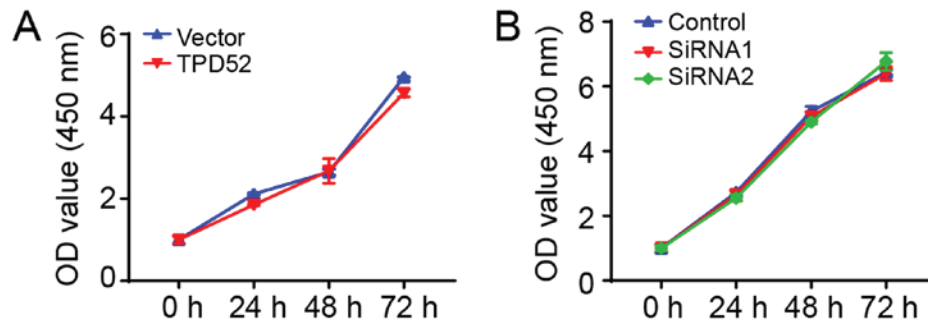

Table SI. Correlations between clinicopathological variables and TPD52 expression in patients with salivary adenoid cystic carcinoma.

| Variables                   | TPD52 expression |         |          | $\chi^2$ | P-value |
|-----------------------------|------------------|---------|----------|----------|---------|
|                             | Total (n)        | Low (n) | High (n) |          |         |
| Age, years                  |                  |         |          | 0.083    | 0.773   |
| <42                         | 19               | 10      | 9        |          |         |
| $\geq$ 42                   | 33               | 16      | 17       |          |         |
| Sex                         |                  |         |          | 2.769    | 0.096   |
| Male                        | 26               | 16      | 10       |          |         |
| Female                      | 26               | 10      | 16       |          |         |
| Tumour size                 |                  |         |          | 0.239    | 0.625   |
| <4 cm                       | 35               | 19      | 16       |          |         |
| $\geq$ 4 cm                 | 17               | 8       | 9        |          |         |
| Clinical stage <sup>a</sup> |                  |         |          | 0.000    | 1.000   |
| I/II                        | 16               | 8       | 8        |          |         |
| III/IV                      | 36               | 18      | 18       |          |         |
| Site                        |                  |         |          | 0.000    | 1.000   |
| Major salivary gland        | 12               | 6       | 6        |          |         |
| Minor salivary gland        | 40               | 20      | 20       |          |         |
| Lymph node metastasis       |                  |         |          | 0.391    | 0.532   |
| Absent                      | 38               | 18      | 20       |          |         |
| Present                     | 14               | 8       | 6        |          |         |
| Perineural invasion         |                  |         |          | 4.690    | 0.030   |
| Absent                      | 24               | 10      | 14       |          |         |
| Present                     | 28               | 20      | 8        |          |         |
| Lung metastasis             |                  |         |          | 3.900    | 0.048   |
| Absent                      | 40               | 17      | 23       |          |         |
| Present                     | 12               | 9       | 3        |          |         |
| Local regional recurrence   |                  |         |          | 1.981    | 0.159   |
| Absent                      | 42               | 19      | 23       |          |         |
| Present                     | 10               | 7       | 3        |          |         |
| Pathological type           |                  |         |          | 3.059    | 0.080   |
| Cribriform/tubular          | 34               | 14      | 20       |          |         |
| Solid                       | 18               | 12      | 6        |          |         |

<sup>a</sup>Clinical stage was determined by the 7th edition of classification system of the Union for International Cancer Control. PD52, Tumour protein D52.
